# Supplementary material
Source: publisher figshare collection journal article supplement (https://sage.figshare.com/ndownloader/files/14639798)
Supplement: Supplementary file 1 [file 14639798]

Appendix 2  
Sample size calculation

---

$$n = \frac{1.96^2 * p(1-p)}{d^2} * DEFF * s = 812 * 2 * 2 = 3,248$$

Estimated prevalence,  $p$  = 0.05

Precision,  $d$  = 0.015

Confidence interval,  $z$  = 1.96

Sample size per stratum,  $n$  = 811

Design effect,  $DEFF$  = 2

Strata,  $s$  = 2

Response rate

    Available LQ = 0.90

    Eligible LQ = 0.90

    Household = 0.70

    Overall,  $r$  = 0.567

Final sample size,  $n$  = 5,722

---
